# Supplementary material for: Leukocyte telomere length, T cell composition and DNA methylation age
Source: publisher site journal article supplement (doi:10.18632/aging.101293), 2017-09-20
Supplement: Supplementary file [file aging-v9i9-101293-supplementary-material-SD1.pdf]

## SUPPLEMENTAL MATERIAL

**Table S1. Study population characteristics.**

| Variable                                                                            | WHI                     | FHS                      | BHS                     |
|-------------------------------------------------------------------------------------|-------------------------|--------------------------|-------------------------|
| Sample size, n                                                                      | 804                     | 909                      | 826                     |
| Median age in years, (25 <sup>th</sup> and 75 <sup>th</sup> percentiles)            | 66 (60, 70)             | 66 (61, 74) <sup>a</sup> | 44 (40, 47)             |
| Female sex (n, %)                                                                   | 804 (100%)              | 469 (52%)                | 470 (57%)               |
| Median BMI in kg/m <sup>2</sup> (25 <sup>th</sup> and 75 <sup>th</sup> percentiles) | 29.31<br>(25.51, 33.50) | 27.58<br>(24.69, 30.66)  | 29.34<br>(25.62, 34.65) |
| Current smoker (n, %)                                                               | 95 (12%)                | 91 (10%)                 | 224 (27%)               |
| Race/ethnicity (n, %)                                                               |                         |                          |                         |
| White                                                                               | 467 (58%)               | 917 (100%)               | 576 (70%)               |
| African American                                                                    | 337 (42%)               | 0 (0%)                   | 250 (30%)               |
| Median biomarker distributions (25 <sup>th</sup> and 75 <sup>th</sup> percentiles)  |                         |                          |                         |
| LTL (kb)                                                                            | 6.87 (6.47, 7.31)       | 6.96 (6.58, 7.39)        | 6.85 (6.45, 7.39)       |
| EEAA (years) <sup>†</sup>                                                           | -0.83 (-4.94, 2.89)     | -0.21 (-3.69, 3.14)      | -0.27 (-2.81, 2.72)     |

<sup>†</sup> Extrinsic epigenetic age acceleration (EEAA) <sup>a</sup> Represents age at sample collection for DNA methylation. Age at LTL sample collection was median=57, 25<sup>th</sup> percentile=52, and 75<sup>th</sup> percentile=65 years of age.

**Table S2. Sex-specific associations for leukocyte telomere length (kb) and extrinsic epigenetic age acceleration (years). All models adjusted for age, body mass index, race (BHS only) and smoking status.**

| Cohort | Sex    | Partial correlation coefficient (p-value) | Beta* (p-value) |
|--------|--------|-------------------------------------------|-----------------|
| FHS    | Male   | -0.08 (0.09)                              | -0.78 (0.09)    |
|        | Female | -0.11 (0.02)                              | -1.03 (0.02)    |
| BHS    | Male   | -0.04 (0.47)                              | -0.24 (0.47)    |
|        | Female | -0.11 (0.02)                              | -0.63 (0.02)    |

\* Regression model (stratified by sex): EEAA = leukocyte telomere length + age + BMI + race (in BHS) + smoking. \*\*Wald test for differences in beta coefficients across sexes were p=0.58 for FHS and p=0.34 for BHS.

**Table S3. Race-specific associations for leukocyte telomere length (kb) and extrinsic epigenetic age acceleration (years). All models adjusted for age, body mass index, sex (BHS only) and smoking status.**

| Cohort | Sex              | Partial correlation coefficient (p-value) | Beta* (p-value) |
|--------|------------------|-------------------------------------------|-----------------|
| WHI    | White            | -0.17 (0.0003)                            | -1.72 (0.0003)  |
|        | African American | -0.19 (0.0004)                            | -2.21 (0.0004)  |
|        |                  |                                           |                 |
| BHS    | White            | -0.06 (0.15)                              | -0.35 (0.15)    |
|        | African American | -0.10 (0.12)                              | -0.65 (0.12)    |
|        |                  |                                           |                 |

\* Regression model (stratified by race/ethnicity): EEAA = leukocyte telomere length + age + BMI + sex (BHS only) smoking. \*\* Wald test for differences in beta coefficients across racial/ethnic groups were p= 0.33 for WHI and p=0.50 for BHS.

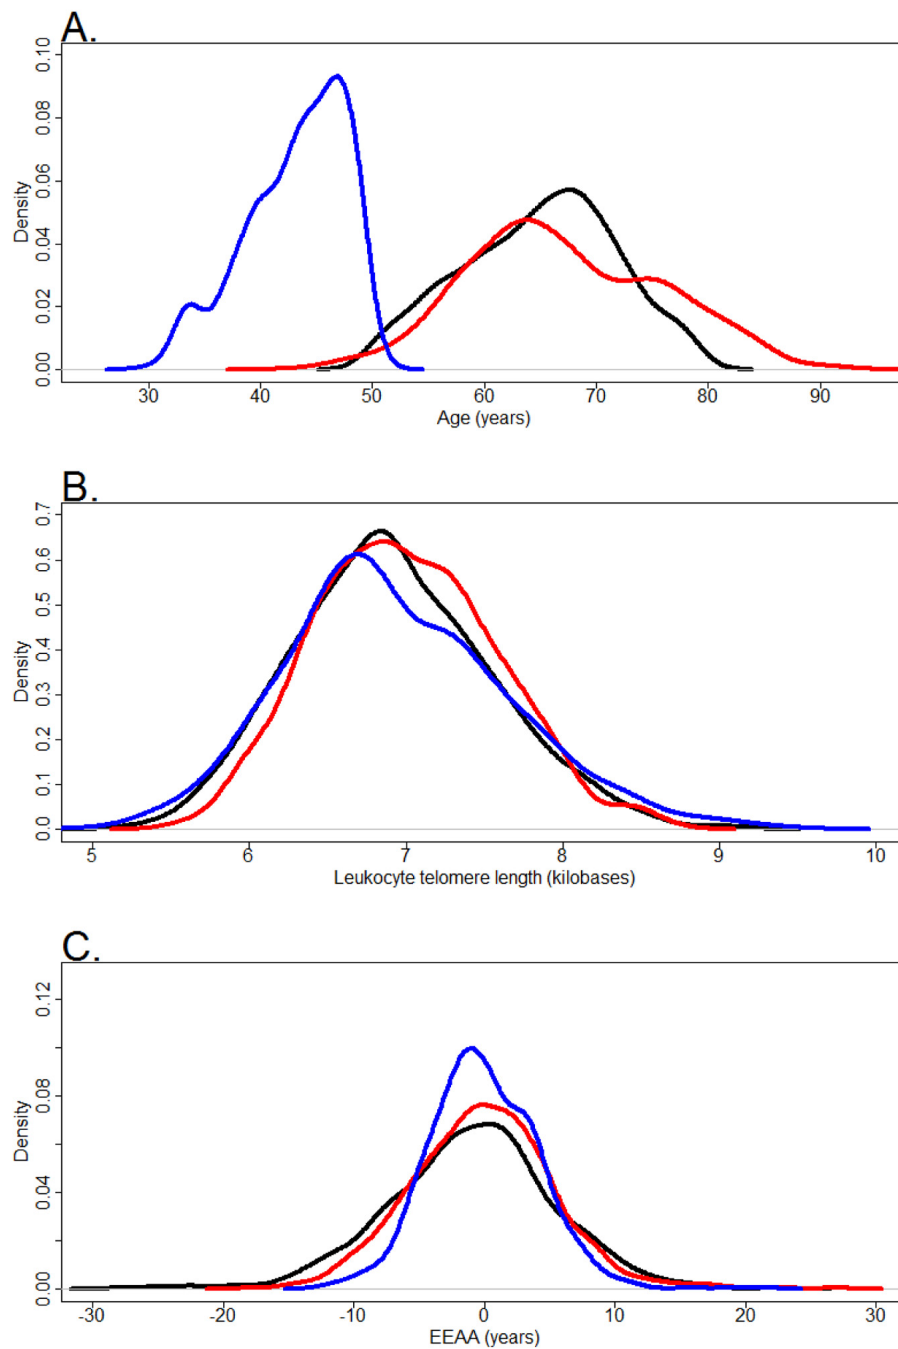

**Figure S1. Kernel density distributions across study populations for (A) chronological age, (B) leukocyte telomere length, (C) extrinsic epigenetic age acceleration. Blue=Bogalusa Heart Study. Red=Framingham Heart Study. Black=Women's Health Initiative.**

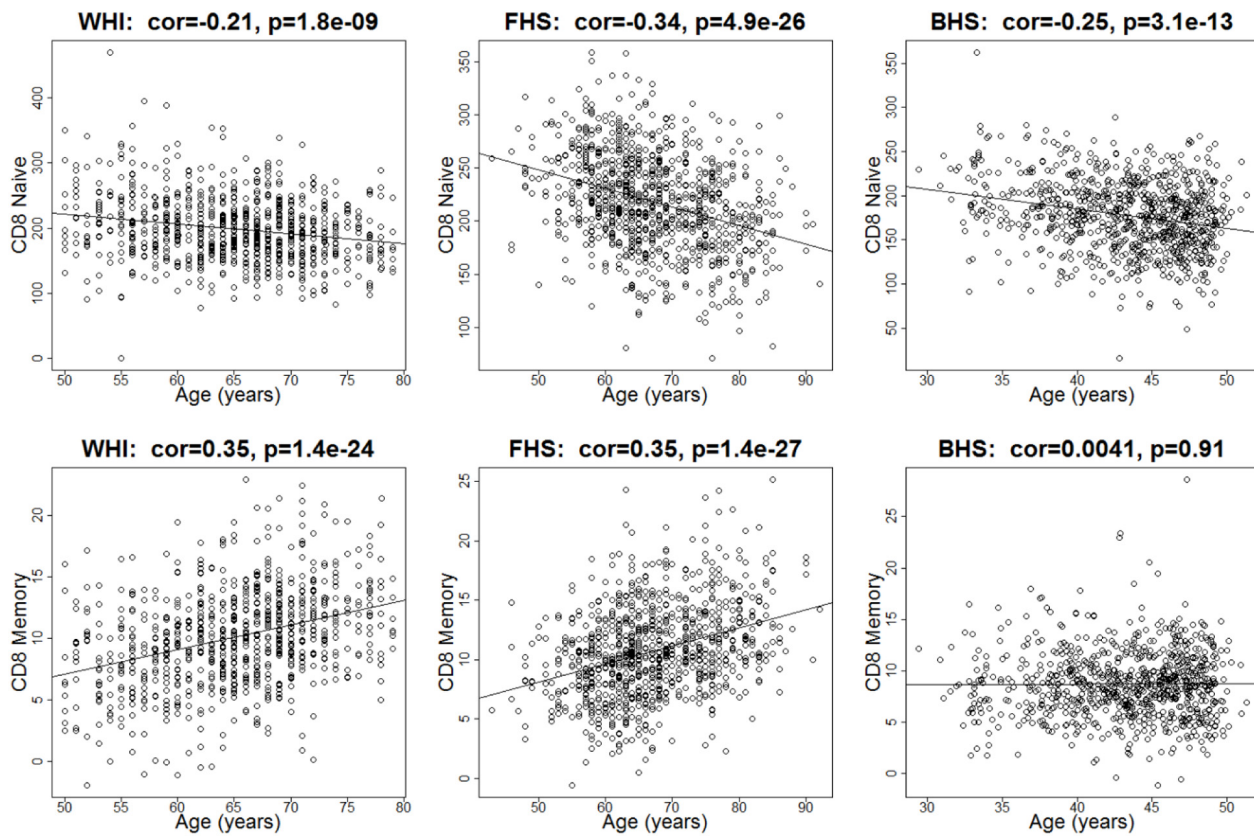

**Figure S2. Plots of cell abundances for naïve CD8<sup>+</sup> T cells (row 1) and memory CD8<sup>+</sup> T cells (row 2) against chronological age by cohort.** Women's Health Initiative (WHI) in column 1. Framingham Heart Study (FHS) in column 2. Bogalusa Heart Study (BHS) in column 3. Cell proportions were estimated from DNA methylation data. The lack of significant correlation in the BHS between memory CD8<sup>+</sup> T cells and age may be attributable to the younger age and narrower age range in BHS compared to WHI and FHS.
